# Supplementary material
Source: publisher figshare collection journal article supplement (https://acs.figshare.com/ndownloader/files/10724887)
Supplement: Supplementary file 1 [file 10724887]

Compound	SMILES	PDE4B1 IC50 (nM)	HPBMC TNFa IC50 (nM)
21	O=C(NCC1)C(C1=N2)=C(NC3=CC=CC(OC)=C3)C=C2C4=CC=CC=C4	1.64	5.4
22	O=C1C(C(NC2=CC(OC)=CC=C2)=C3)=C(N=C3C4=CC=CC(Br)=C4)CCN1	8.24
23	O=C(NCC1)C(C1=N2)=C(NC3=CC=CC(OC)=C3)C=C2C4=CC=CC(OC)=C4	8.39
24	O=C(NCC1)C(C1=N2)=C(NC3=CC=CC(OC)=C3)C=C2C4=CC=CC=C4OC	31.82
25	O=C1C(C(NC2=CC=CC(OC)=C2)=C3)=C(N=C3C4=CC=NC=C4)CCN1	3.63	6.5
26	O=C1C(C(NC2=CC=CC(OC)=C2)=C3)=C(N=C3C4=CC=[N+]([O-])C=C4)CCN1	50.86
27	O=C1C(C(NC2=CC=CC(OC)=C2)=C3)=C(N=C3C4CC4)CCN1	8.51
28	O=C(NCC1)C2=C1N=C(C3=CC=CC(C4=CC=C(C(O)=O)C=C4)=C3)C=C2NC5=CC=CC(OC)=C5	0.35	5.7
29	O=C(NCC1)C2=C1N=C(C3=CC=CC(C4=CC=C(C(OCC)=O)C=C4)=C3)C=C2NC5=CC=CC(OC)=C5	7.20	1.2
30	O=C(NCC1)C2=C1N=C(C3=CC=CC(C4=CC(C(O)=O)=CC=C4O)=C3)C=C2NC5=CC=CC(OC)=C5	9.60	135
31	O=C(NCC1)C2=C1N=C(C3=CC=CC(C4=CC(C(OC)=O)=CC=C4O)=C3)C=C2NC5=CC=CC(OC)=C5	5.6	4.2
32	O=C(NCC1)C2=C1N=C(C3=CC=CC(C4=CC=CC(C(N)=O)=C4)=C3)C=C2NC5=CC=CC(OC)=C5	0.28	2.3
33	O=C(NCC1)C2=C1N=C(C3=CC=CC(C4=CC=CC(C(NC5CC5)=O)=C4)=C3)C=C2NC6=CC=CC(OC)=C6	2.07	0.43
34	O=C(NCC1)C2=C1N=C(C3=CC=CC(C4=CC=CC(C(NCCN(C)C)=O)=C4)=C3)C=C2NC5=CC=CC(OC)=C5	0.23	2.8
35	O=C(NCC1)C2=C1N=C(C3=CC=CC(C4=CC=CC(O)=C4)=C3)C=C2NC5=CC=CC(OC)=C5	1.80	4.2
36	O=C(NCC1)C2=C1N=C(C3=CC=CC(SC4=CC(OC)=CC=C4)=C3)C=C2NC5=CC=CC(OC)=C5	1.62	3.35
37	O=C(NCC1)C2=C1N=C(C3=CC=CC=C3)C=C2N	2389.79
38	O=C(NCC1)C(C1=N2)=C(NC3=CC(C#N)=CC=C3)C=C2C4=CC=CC=C4	3.30	13.4
39	O=C1C(C(NC2=CC(OC)=CC(OC)=C2)=C3)=C(N=C3C4=CC=CC=C4)CCN1	26.92
40	O=C(NCC1)C(C1=N2)=C(NC3=CC(CO)=CC=C3)C=C2C4=CC=CC=C4	24.13
41	O=C(NCC1)C(C1=N2)=C(NC3=CC=C(CCO)C=C3)C=C2C4=CC=CC=C4	11.863
42	O=C1C(C(NC2=CC=C(C[C@H](CO)O)C=C2)=C3)=C(N=C3C4=CC=CC=C4)CCN1	8.70	0.49
43	O=C(NCC1)C2=C1N=C(C3=CC=CC=C3)C=C2NC4=CC=C(C(O)=O)C(OC)=C4	2.33	9.9
44	O=C(NCC1)C2=C1N=C(C3=CC=CC=C3)C=C2NC4=CC=C(C(N)=O)C=C4	1.53	4.2
45	O=C(NCC1)C2=C1N=C(C3=CC=CC=C3)C=C2NC4=CC=CC(C(N)=O)=C4	11.7587
46	O=C(NCC1)C2=C1N=C(C3=CC=CC=C3)C=C2NC4=C(C)C=CN=C4	41.70
47	O=C1C2=C(N=C(C3=CC=CC=C3)C=C2NCC4=CC=NC=C4)CCN1	25.36
48	O=C1C(C(NCCC2=CC=NC=C2)=C3)=C(N=C3C4=CC=CC=C4)CCN1	12.47
49	O=C(NCC1)C(C1=N2)=C(NC3=CC=CC4=C3C=CC=C4)C=C2C5=CC=CC=C5	11.48
50	O=C1C(C(NC2=C3C(N=CC=C3)=CC=C2)=C4)=C(N=C4C5=CC=CC=C5)CCN1	0.96	0.92
51	O=C1C(C(NC2=C3C(C=NC=C3)=CC=C2)=C4)=C(N=C4C5=CC=CC=C5)CCN1	14.20
52	O=C(NCC1)C(C1=N2)=C(NC3=CC=C(N=CC=C4)C4=C3)C=C2C5=CC=CC=C5	2.3	4.9
53	O=C(NCC1)C(C1=N2)=C(NC3=NNC4=C3C=CC=N4)C=C2C5=CC=CC=C5	5.6	2.96
54	O=C1C(C(NC2=NN(C)C3=C2C=CC=N3)=C4)=C(N=C4C5=CC=CC=C5)CCN1	10.8
55	O=C1C(C(NC2=NN(C3=CC=CC=C3)C4=C2C=CC=N4)=C5)=C(N=C5C6=CC=CC=C6)CCN1	56
56	O=C(NCC1)C(C1=N2)=C(NC3=CC=CC4=C3C=CC=[N+]4[O-])C=C2C5=CC=CC=C5	0.43	0.47
57	O=C1C(C(NC2=CC=CC(OC)=C2)=N3)=C(N=C3C4=CC=CC=C4)CCN1	52.2215	39.5
58	O=C1C2=C(N=C(C3=CC=CC=C3)C=C2NC4=CC=CC(OC)=C4)CC(C)N1	117.27	274
59	O=C(NCC1C)C(C1=N2)=C(NC3=CC=CC(OC)=C3)C=C2C4=CC=CC=C4	640.00
60	NC(C1=CN=C(C2=CC=CC=C2)C=C1NC3=CC(OC)=CC=C3)=O	236.96
61	NC(C(C=N1)=C(NC2=CC=CC3=C2C=CC=N3)C=C1C4=CC=CC=C4)=O	34.63
62	O=C(NC)C1=CN=C(C2=CC=CC=C2)C=C1NC3=C(C=CC=N4)C4=CC=C3	5794.2084
63	COC1=CC(NC2=C(/C(NCC3)=N/O)C3=NC(C4=CC(OC)=CC=C4)=C2)=CC=C1	2037
64	COC1=CC(NC2=C(/C(NCC3)=N/C#N)C3=NC(C4=CC(OC)=CC=C4)=C2)=CC=C1	13
65	O=C(NCC1)C(C1=N2)=C(NC3=CC=CC4=C3C=CC=N4)C=C2C5=CC=C(F)C(F)=C5	0.75	1.52
66	FC1=CC(C2=CC(NC3=CC=CC4=C3C=CC=N4)=C(/C(NCC5)=N/C#N)C5=N2)=CC=C1F	0.89	16.75
67	OC1=CC(C2=CC(C3=CC(NC4=CC=CC5=C4C=CC=N5)=C(C(NCC6)=O)C6=N3)=CC=C2)=CC=C1	0.89	0.5
68	O=C1C(C(NC2=CC=CC3=C2C=CC=N3)=C4)=C(N=C4C5=CC=CC(C6=CC=C(C(O)=O)C=C6)=C5)CCN1	0.11	0.52
69	O=C(NCC1)C(C1=N2)=C(NC3=CC=CC4=C3C=CC=N4)C=C2C5=CC=CC(C6=CC=C(C(OCC)=O)C=C6)=C5	1.22	0.66
70	O=C(NC1CC1)C2=CC(C3=CC(C4=CC(NC5=CC=NC6=C5C=CC=C6)=C(C(NCC7)=O)C7=N4)=CC=C3)=CC=C2	0.27	0.46
71	O=C(NC1CC1)C2=CC(C3=CC(C4=CC(NC5=CN=CC6=C5C=CC=C6)=C(C(NCC7)=O)C7=N4)=CC=C3)=CC=C2	0.32	1.07
72	O=C(NC1CC1)C2=CC(C3=CC(C4=CC(NC5=CC=CC6=C5C=CC=N6)=C(C(NCC7)=O)C7=N4)=CC=C3)=CC=C2	0.17	0.12
73	O=C(NC1CC1)C2=CC(C3=CC(C4=CC(NC5=CC=CC6=C5C=CC=[N+]6[O-])=C(C(NCC7)=O)C7=N4)=CC=C3)=CC=C2	0.045	0.075
74	O=C(NCCCN(C)C)C1=CC(C2=CC(C3=CC(NC4=CC=CC5=C4C=CC=N5)=C(C(NCC6)=O)C6=N3)=CC=C2)=CC=C1	0.105	0.36
